# Supplementary material for: Free Amino Acids Profile and Expression Analysis of Core Genes Involved in Branched-Chain Amino Acids Metabolism during Fruit Development of Longan (Dimocarpus longan Lour.) Cultivars with Different Aroma Types
Source: MDPI journal article supplement (doi:10.3390/biology10080807), 2021-08-20
Supplement: s1 [file s1]

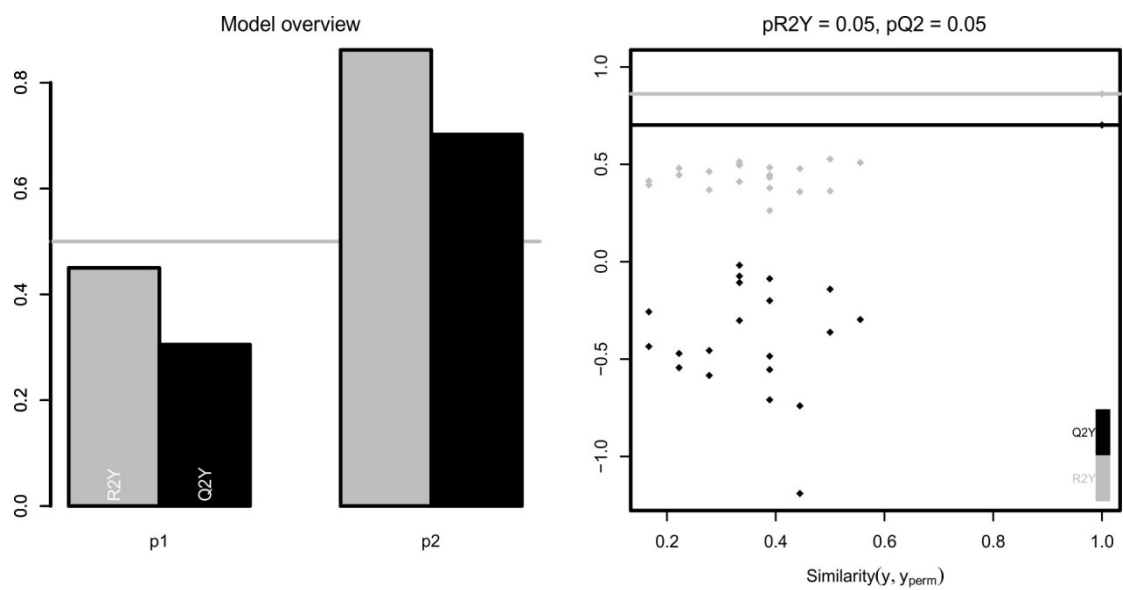

**Figure S1** PLS-DA significance diagnostic for FAAs of three longan cultivars at different maturation stages.
